# Supplementary material for: Valley floor inclination affecting valley winds and transport of passive tracers in idealised simulations
Source: Copernicus journal article supplement (doi:10.5194/acp-25-511-2025), 2025-01-16
Supplement: Supplementary file [file acp-25-511-2025-supplement.pdf]

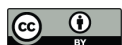

*Supplement of*

## **Valley floor inclination affecting valley winds and transport of passive tracers in idealised simulations**

**Johannes Mikkola et al.**

*Correspondence to:* Johannes Mikkola ([johannes.mikkola@helsinki.fi](mailto:johannes.mikkola@helsinki.fi))

The copyright of individual parts of the supplement might differ from the article licence.

**Table S1.** Tracer release locations and times in cases FLAT, I1, I2 and I3

| Tracer   | <i>y</i> -release | <i>x</i> -release | Release start | Release duration |
|----------|-------------------|-------------------|---------------|------------------|
| <b>1</b> | 0 ... 10 km       | -2 ... 2 km       | Day 1 09:00am | 60 min           |
| <b>2</b> | 20 ... 30 km      | -2 ... 2 km       | Day 1 09:00am | 60 min           |
| <b>3</b> | 40 ... 50 km      | -2 ... 2 km       | Day 1 09:00am | 60 min           |
| <b>4</b> | 20 ... 30 km      | 2 ... 6 km        | Day 1 09:00am | 60 min           |

**Table S2.** Tracer release locations and times in case SLOPE

| Tracer   | <i>y</i> -release | <i>x</i> -release | Release start | Release duration |
|----------|-------------------|-------------------|---------------|------------------|
| <b>1</b> | 0 ... 10 km       | -20 ... 20 km     | Day 1 09:00am | 60 min           |
| <b>2</b> | 20 ... 30 km      | -20 ... 20 km     | Day 1 09:00am | 60 min           |
| <b>3</b> | 40 ... 50 km      | -20 ... 20 km     | Day 1 09:00am | 60 min           |

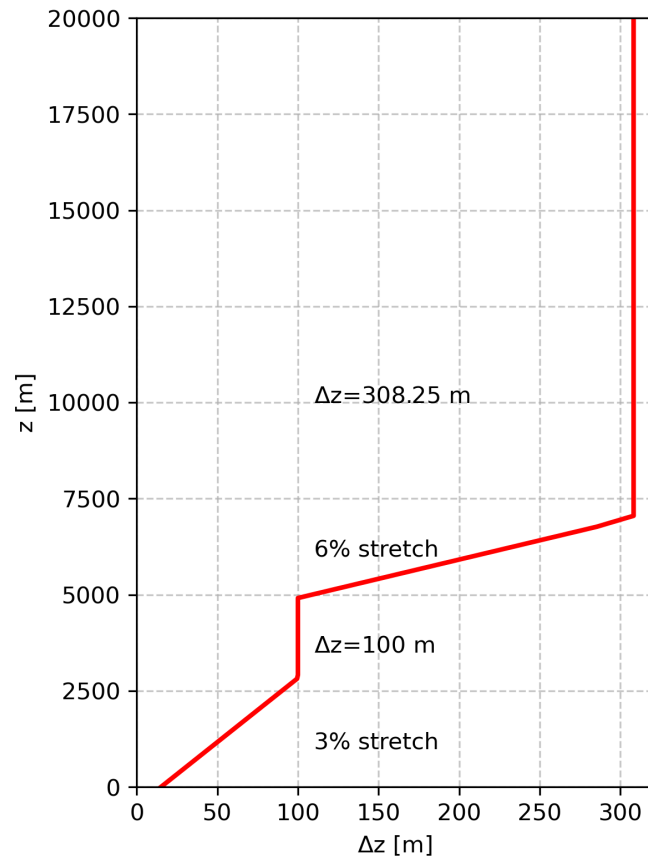

**Figure S1.** Vertical spacing of the model levels in the simulations (shown for grid points with surface height at 0 meters).

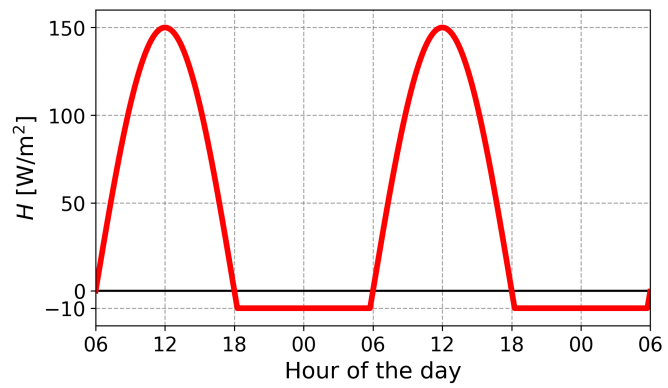

**Figure S2.** Prescribed surface sensible heat flux in the simulations (Eq. 1 in Section 2).

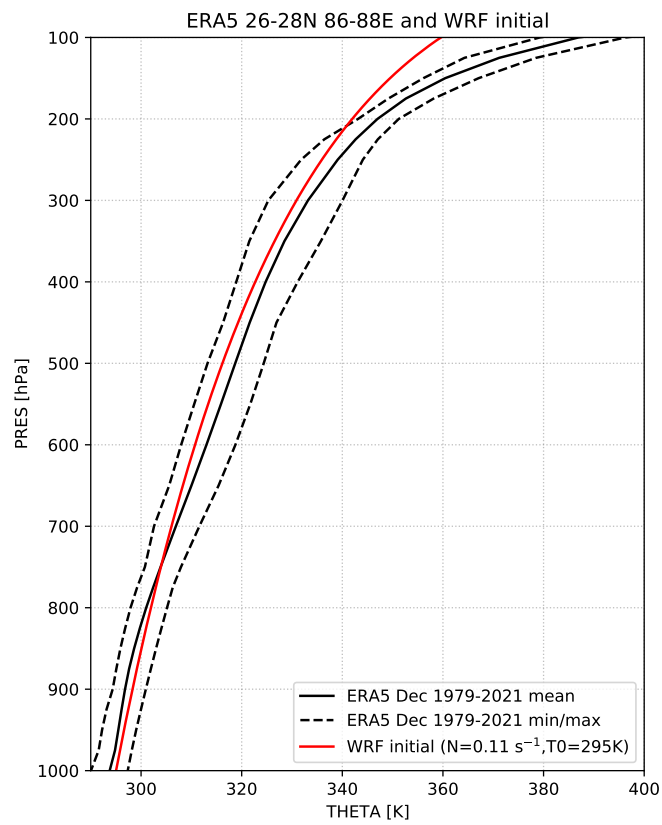

**Figure S3.** Initial temperature profile of the WRF-simulations and ERA5 1979-2021 December average profile for 26-28N 86-88E.

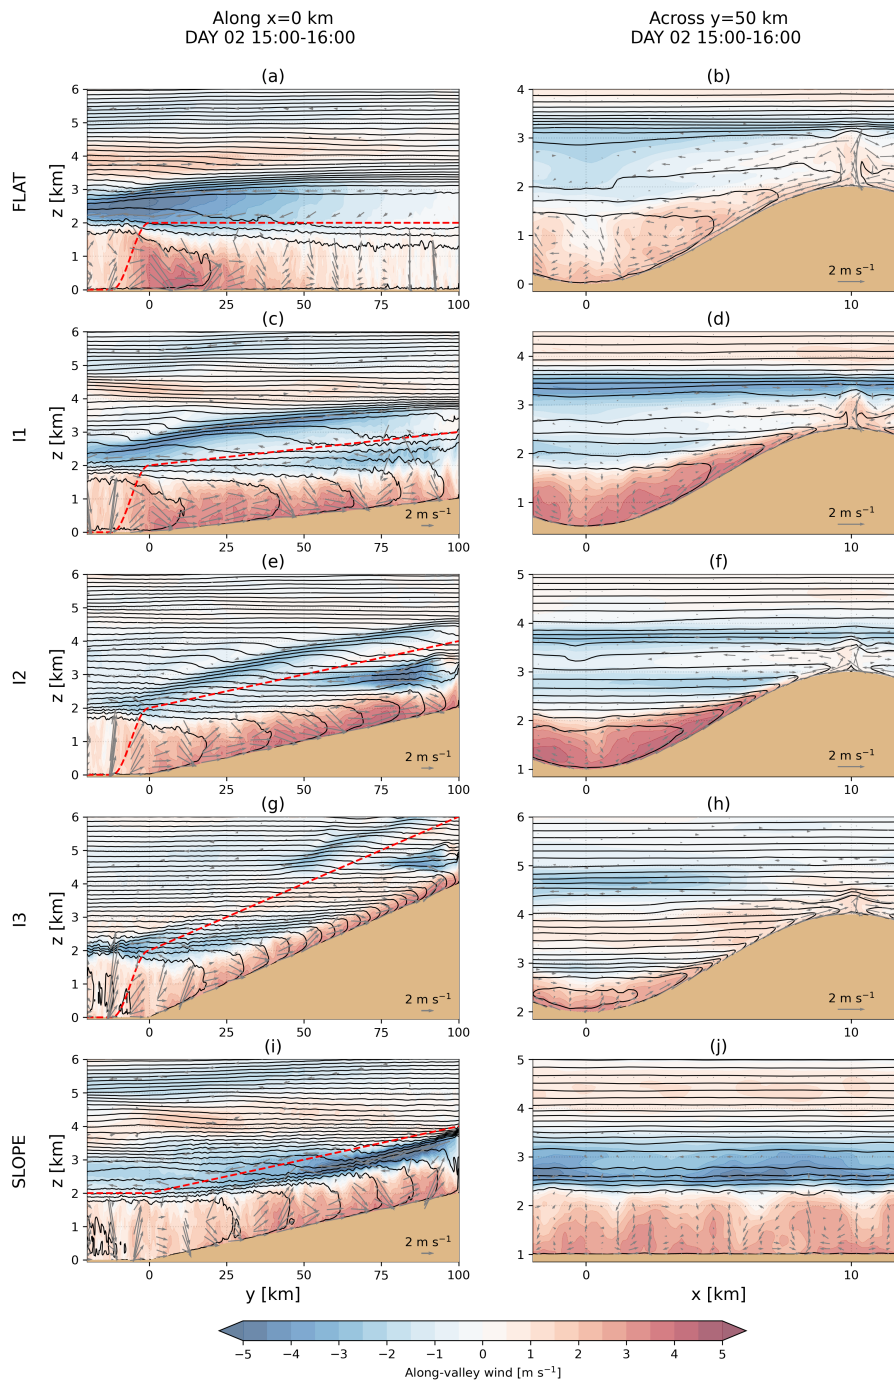

**Figure S4.** Same as Fig. 3 in the main text but for the second day of the simulation at 15:00-16:00.

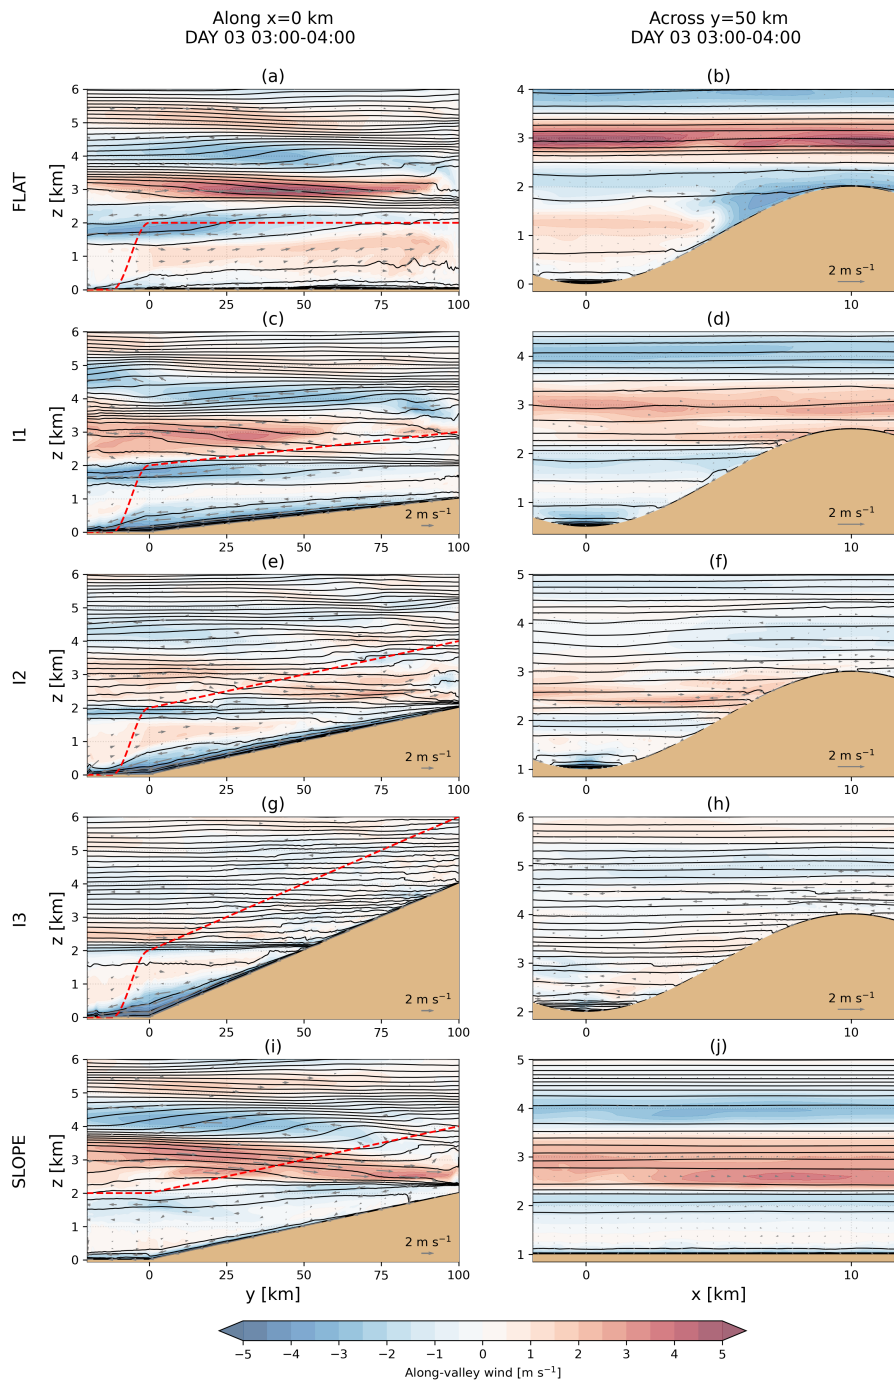

**Figure S5.** Same as Fig. 4 in the main text but for the second night of the simulation at 03:00-04:00.

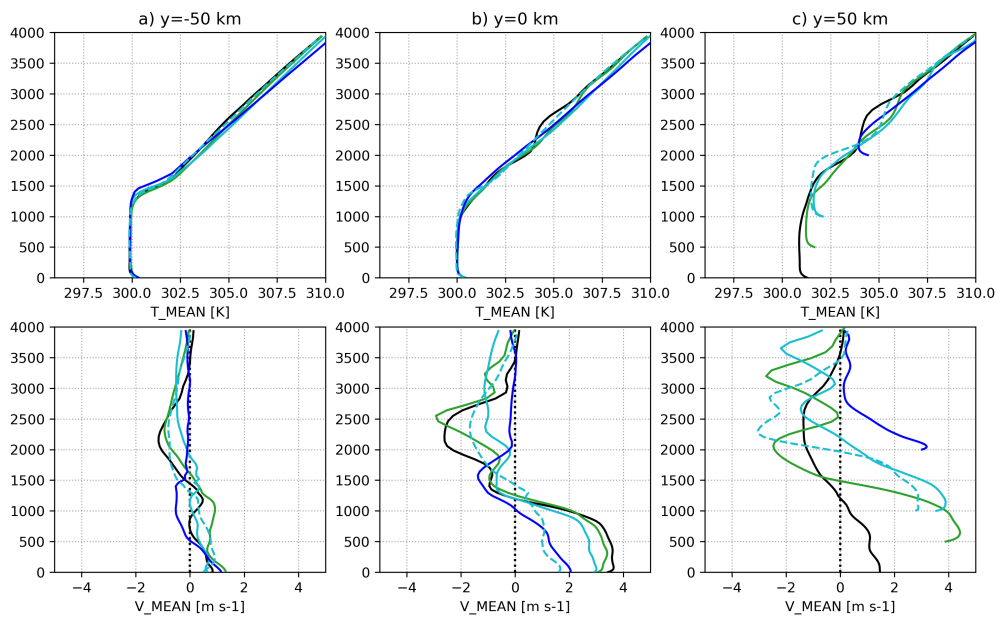

**Figure S6.** Potential temperature (upper row) and along-valley wind (lower row) profiles along  $x = 0$  km **a)** at the plain  $y = -50$  km **b)** valley entrance  $y = 0$  km **c)** mid-way of the valley  $y = 50$  km at 15:00-16:00 on the first day of the simulation.

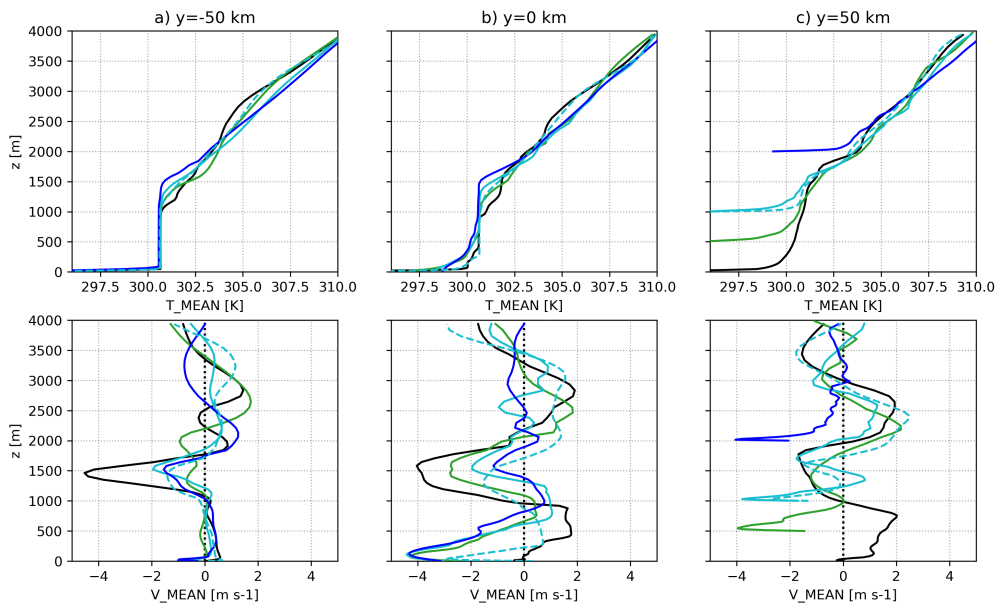

**Figure S7.** Same as Supplementary Figure S6 but at 03:00-04:00 on the first night of the simulation.

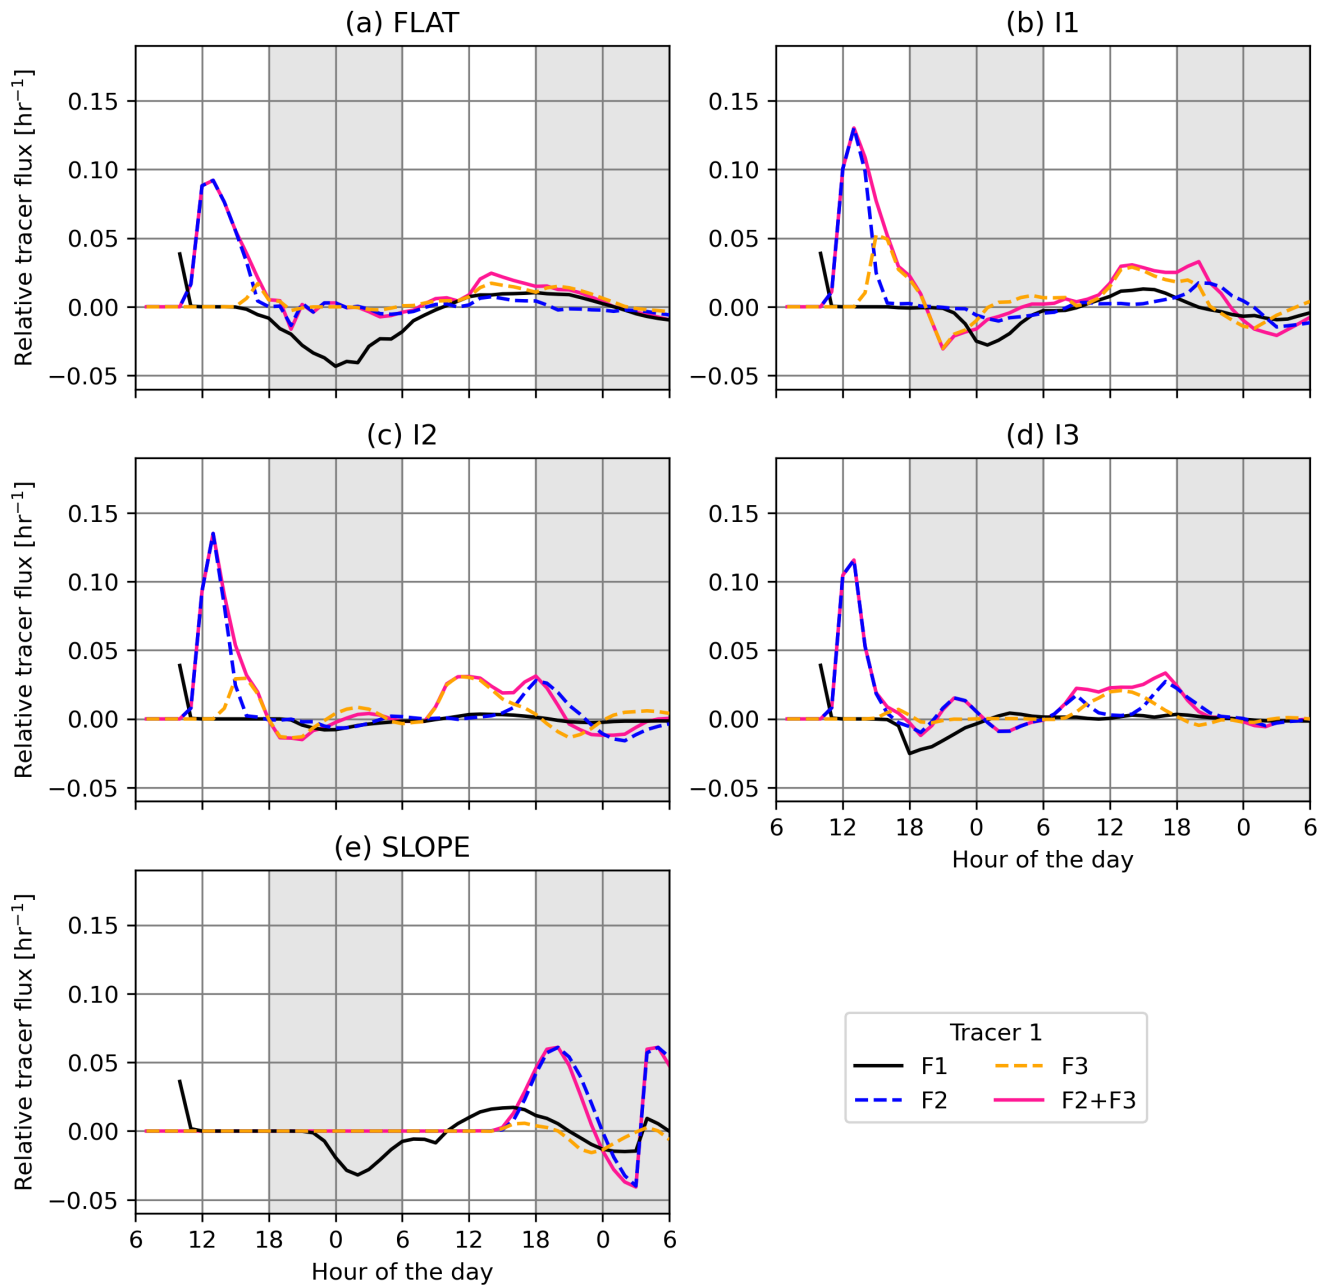

**Figure S8.** Same as Fig. 8 but for tracer 1



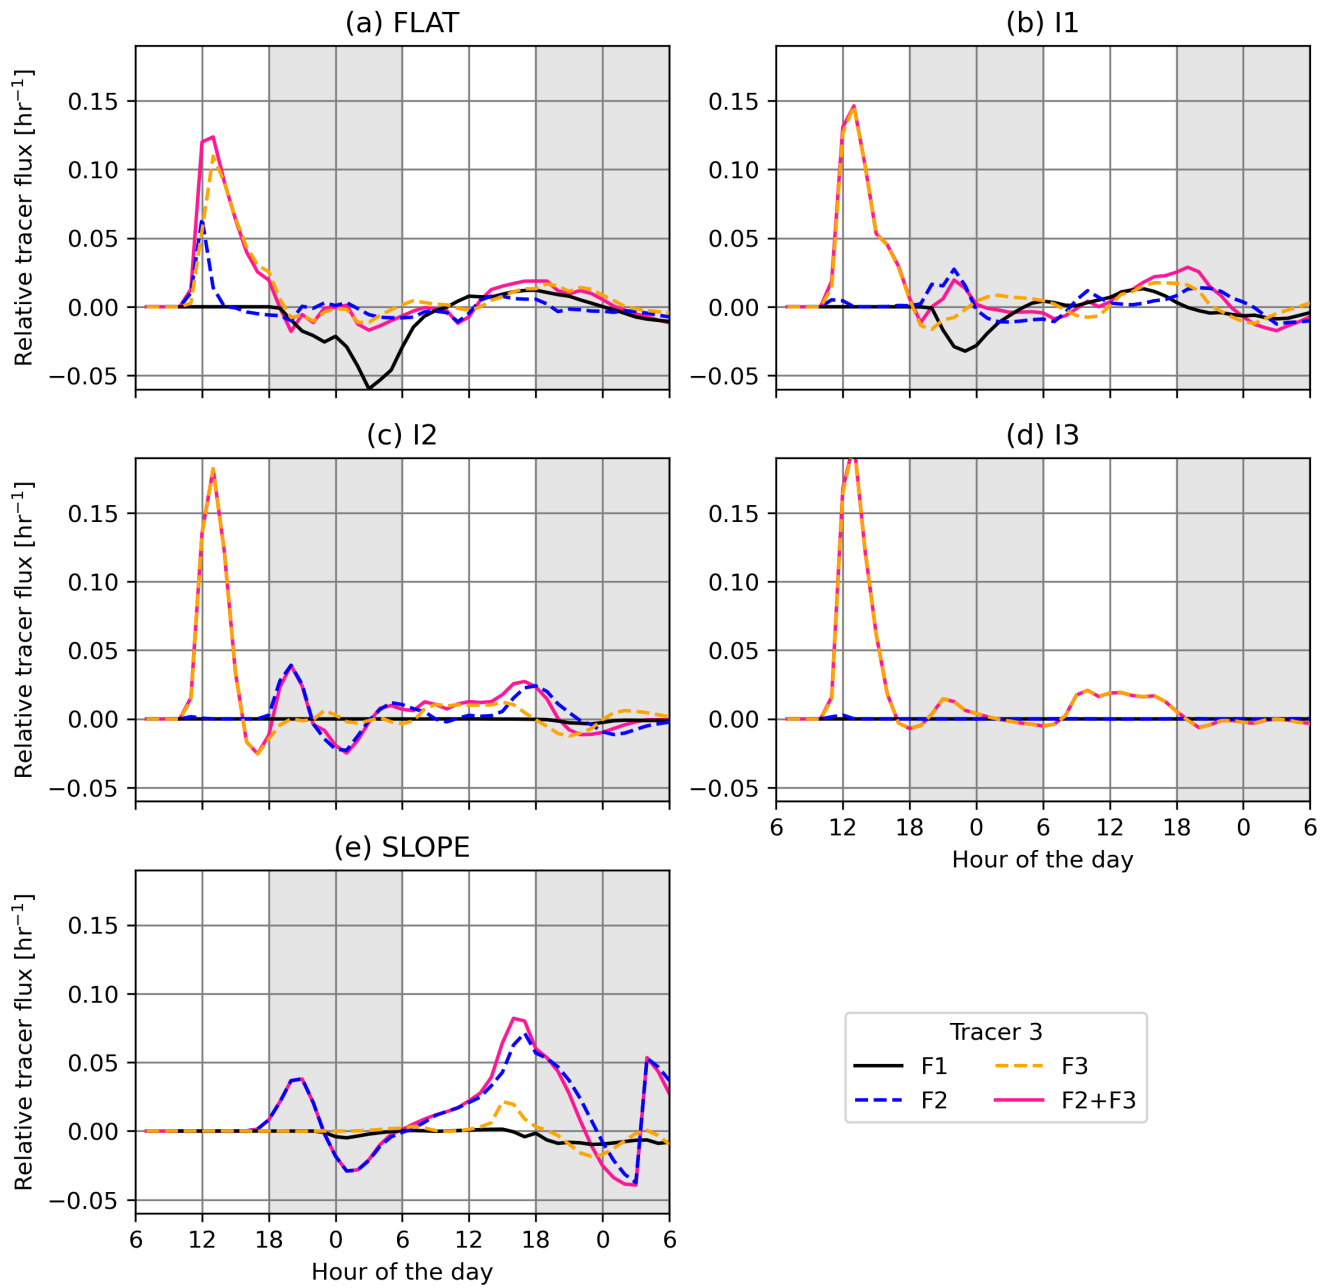

**Figure S9.** Same as Fig. 8 but for tracer 3

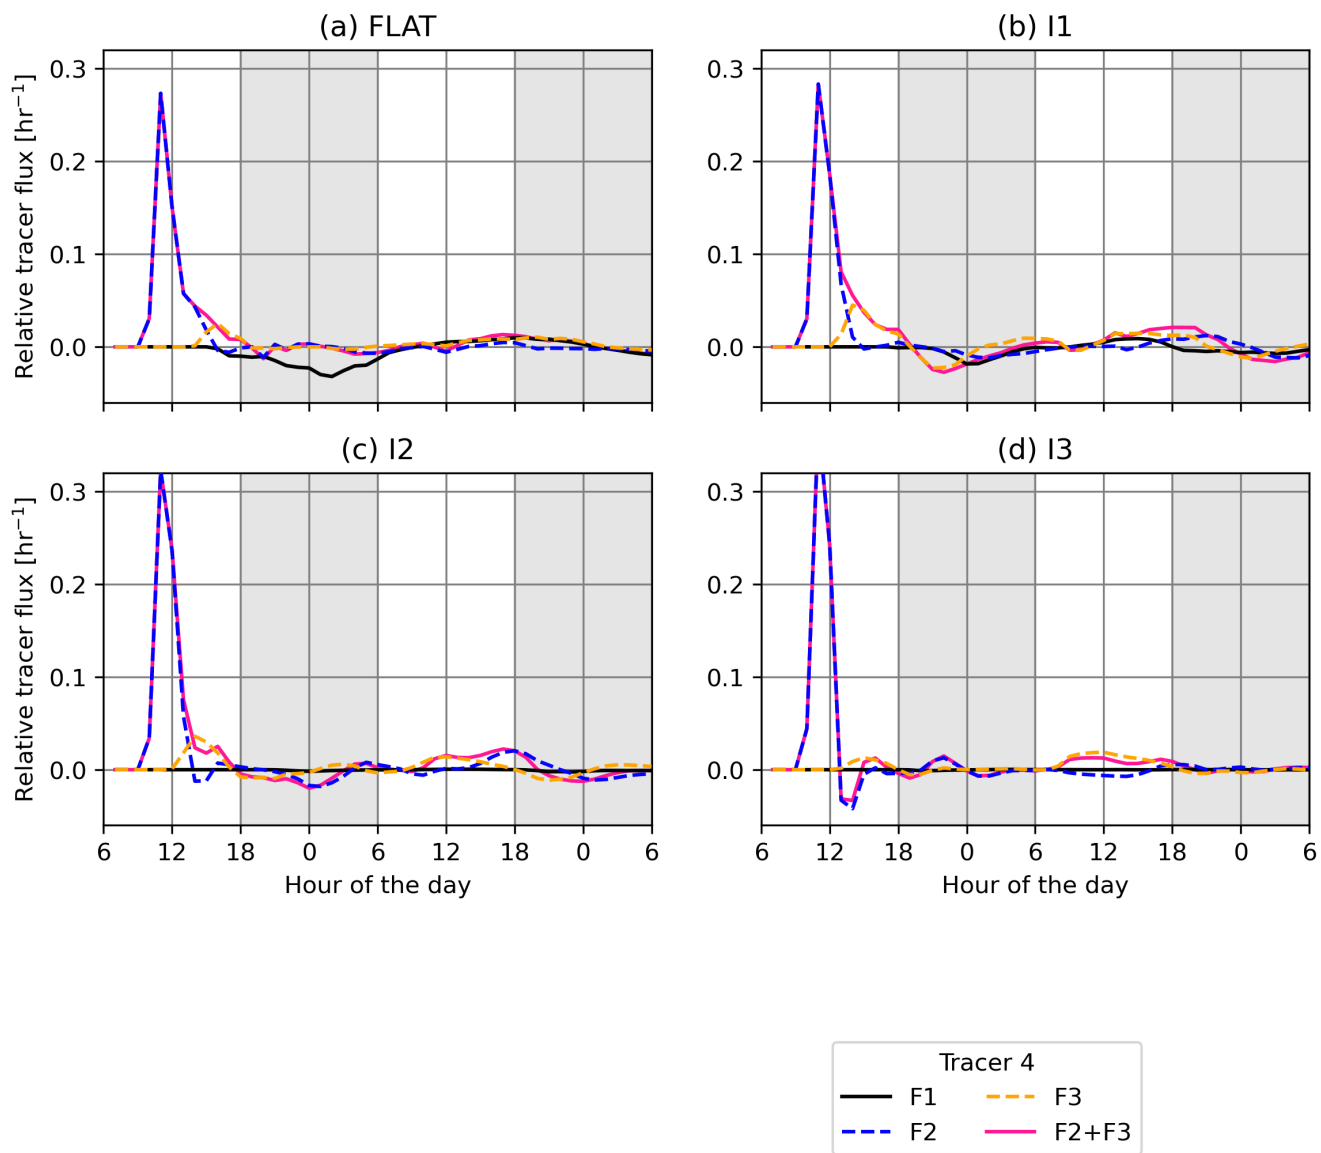

**Figure S10.** Same as Fig. 8 but for tracer 4. Note that the y-scale is different compared to Figures 8 and Supplementary Figures S8 and S9.
